# Supplementary material
Source: publisher figshare collection journal article supplement (https://gsapubs.figshare.com/articles/dataset/_/24045477)
Supplement: Supplementary file 2 [file 1]

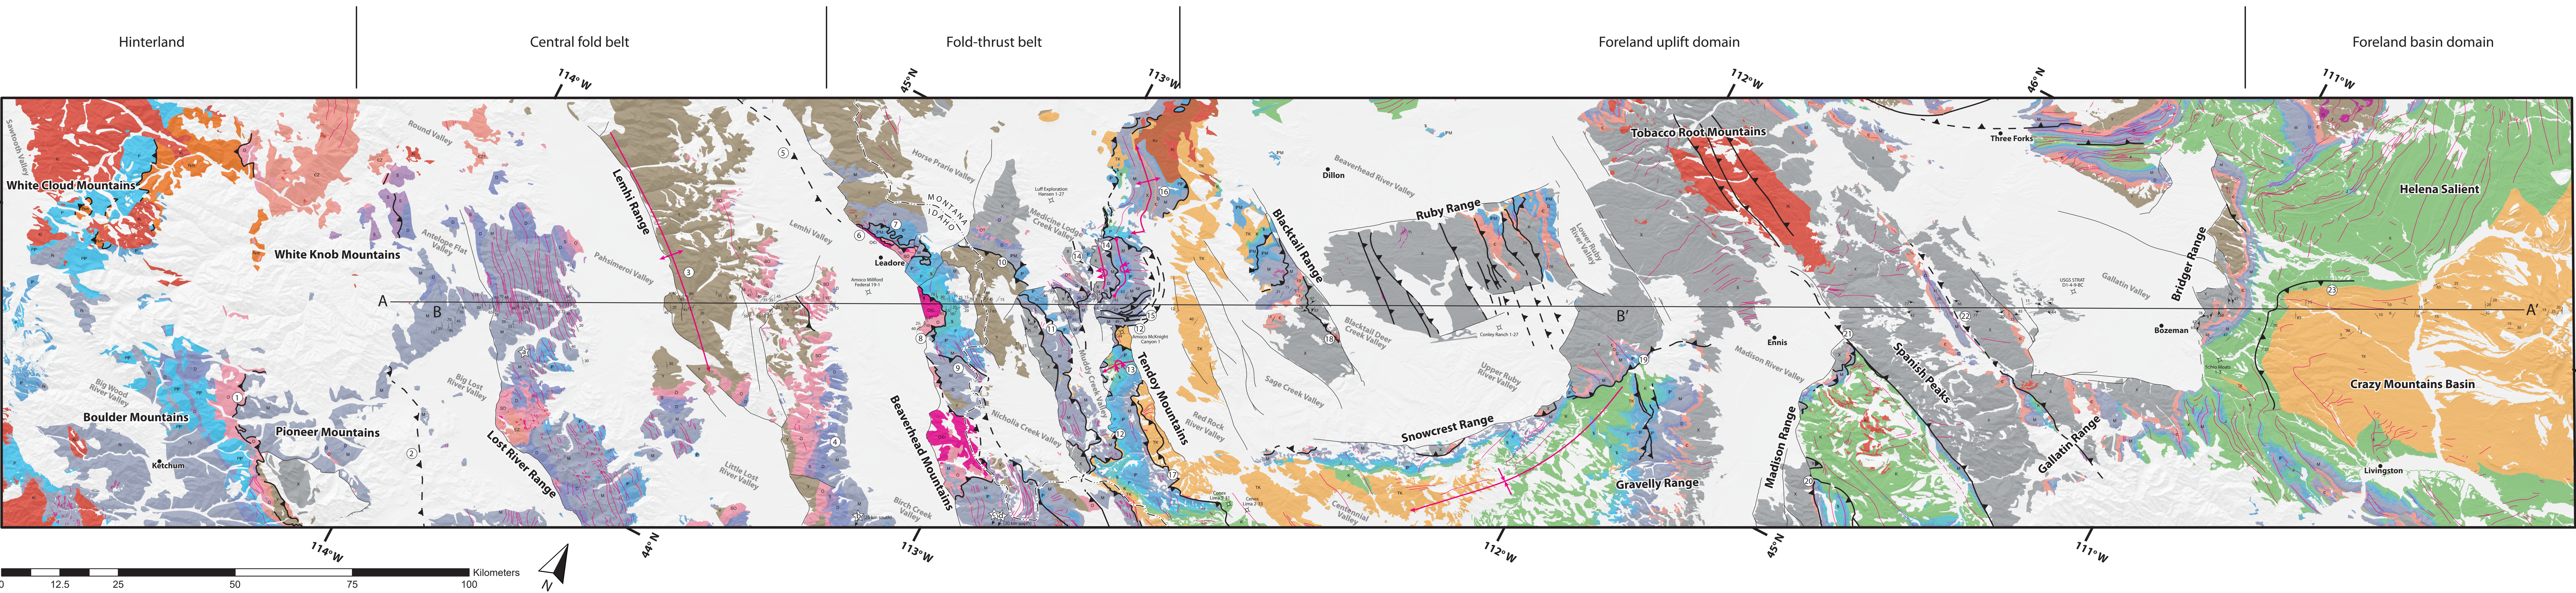

## MAJOR FOLDS AND THRUSTS

- 1) Pioneer thrust
- 2) Copper Basin thrust
- 3) Patterson culmination
- 4) White Knob fold belt
- 5) Poison Creek thrust
- 6) Baby Joe Gulch thrust system
- 7) Thompson Gulch thrust
- 8) Hawley Creek thrust
- 9) Fritz Creek thrust
- 10) Cabin thrust
- 11) Medicine Lodge thrust
- 12) Four Eyes Canyon thrust
- 13) Little Water syncline
- 14) Johnson thrust system
- 15) McKenzie thrust system
- 16) Armstead anticline
- 17) Tendency thrust
- 18) Jake Canyon thrust
- 19) Snowcrest-Greenhorn thrust (Blacktail-Snowcrest uplift)
- 20) Scarface-Hilgard thrust system (Gravelly-Madison uplift)
- 21) Spanish Peaks thrust
- 22) Cherry Creek fault
- 23) Battle Ridge backthrust

Abplanalp, J. M., Pink, C., Pope, M. C., and Watkinson, J. A., 2008, Geologic map of the southern Beaverhead Range (parts of Copper Mountain, Shamrock Gulch, Scott Butte, and Snaky Canyon quadrangles), Clark, Jefferson, and Lemhi Counties, east-central Idaho: Idaho Geological Survey, Technical Reports T-08-1, scale 1:24,000.

Berg, R.B., Lopez, D.A., and Lonn, J.D., 2000, Geologic map of the Livingston 30' x 60' quadrangle, southwest Montana: Montana Bureau of Mines and Geology, Open-File Reports MBMG-406, scale 1:100,000.

Burmester, R. F., Mosolf, J., Stanford, L. R., Lewis, R. S., Othberg, K. L., and Lonn, J. D., 2018, Geologic map of the Lemhi Pass quadrangle, Lemhi County, Idaho, and Beaverhead County, Montana: Digital Web Maps DWM-183, scale 1:24,000.

Crawford, B. M. and Pearson, D.M., 2018, Geologic map of the Ashbough Canyon 7.5' quadrangle, Beaverhead County, Montana: Montana Bureau of Mines and Geology EDMAP portion of the National Geologic Mapping Program 12, scale 1:24,000.

Diedesch, T. F., Rodgers, D. W., and Link, P. K., 2012, Geologic map of portions of the Phi Kappa Mountain, Hyndman Peak, and Grays Peak quadrangles, Blaine and Custer Counties, Idaho: Idaho Geological Survey, Technical Reports T-12-4, scale 1:24,000.

Evans, K. V., and Green, G. N., 2003, Geologic map of the Salmon National Forest and vicinity, East-Central Idaho, U.S. Geological Survey, Geologic Investigations Series I-2765, scale 1:100,000.

Fisher, F.S., McIntyre, D.H., and Johnson, K.M., 1992, Geologic map of the Challis 1 degree x 2 degrees quadrangle, Idaho: U.S. Geological Survey, Miscellaneous Investigations Series Map I-1819, scale 1:250,000.

Hadley, J. B., 1969, Geologic map of the Varney quadrangle, Madison County, Montana, U.S. Geological Survey, Geologic Quadrangle Map GQ-814, scale 1:62,500.

Hansen, C.M., and Pearson, D.M., 2016, Geologic map of the Poison Creek thrust fault and vicinity near Poison Peak and Twin Peaks, Lemhi County, Idaho: Idaho Geological Survey, Technical Report T-16-1, scale 1:24,000.

Scholten, R. and Ramspott, L.D., 1968, Geologic map of the central Beaverhead Range, Idaho-Montana, scale 1:37,000. In Tectonic mechanisms indicated by structural framework of central Beaverhead Range, Idaho-Montana (Vol. 104). Geological Society of America.

Janecke, S. U., 1992a, Geologic map of parts of the Big Windy Peak and Moffett Springs 7.5-minute quadrangles, Lemhi and Custer Counties, Idaho: Idaho Geological Survey, Technical Reports T-92-6, scale 1:24,000.

Janecke, S. U., 1992b, Geologic map of the Borah Peak, Burnt Creek, Elkhorn Creek, and Leatherman Peak 7.5-minute quadrangles, Custer and Lemhi Counties, Idaho: Idaho Geological Survey, Technical Reports T-92-5, scale 1:24,000.

Janecke, S. U., 1992c, Geologic map of the Warren Mountain, most of the Red Hills, Short Creek, and Massacre Mountain and some of the Mulkey Bar and Hawley Mountain 7.5-minute quadrangles, Custer and Butte Counties, Idaho: Idaho Geological Survey, Technical Reports T-92-7, scale 1:24,000.

Kellogg, K. S., and Williams, V. S., 2000, Geologic map of the Ennis 30' x 60' quadrangle, Madison and Gallatin Counties, Montana, and Park County, Wyoming: Miscellaneous Investigations Series Map I-2690, scale 1:100,000.

Lewis, R. S., Stewart, D. E., Burmester, R. F., Stanford, L. R., Othberg, K. L., Stewart, E. D., and Lonn, J. D., 2018, Geologic map of the Goat Mountain Quadrangle, Lemhi County, Idaho, and Beaverhead County, Montana: Idaho Geological Survey, scale 1:24,000.

Lonn, J.D., Skipp, Betty, Ruppel, E.T., Perry Jr, W.J., Sears, J.W., Janecke, S.U., Bartholomew, M.J., Stickney, M.C., Fritz, W.J., Hurlow, H.A., and Thomas, R.C., 2000, Geologic map of the Lima 30' x 60' quadrangle, southwest Montana: Montana Bureau of Mines and Geology, Open-File Reports MBMG-408, scale 1:100,000.

Lund, K., 2018, Geologic map of the central Beaverhead Mountains, Lemhi County, Idaho, and Beaverhead County, Montana: U.S. Geological Survey Scientific Investigations Map 3413, scale 1:50,000.

## SOURCE MAPPING REFERENCES

Mahoney, J. B., 1992, Geologic map of the Frenchman Creek quadrangle, Blaine and Camas Counties, Idaho: Idaho Geological Survey, Technical Reports T-92-2, scale 1:24,000.

Mahoney, J. B., Link, P. K., 1992, Geologic map of the Galena quadrangle, Blaine and Camas Counties, Idaho: Idaho Geological Survey, Technical Reports T-92-3, scale 1:24,000.

Mapel, W.J., Read, W.H., and Smith, R.K., 1965, Geologic map and sections of the Doublespring quadrangle, Custer and Lemhi Counties, Idaho: U.S. Geological Survey, Geologic Quadrangle Map GQ-464, scale 1:62,500.

McDonald, C., Elliott, C. G., Vuke, S. M., Lonn, J. D., and Berg, R. B., 2012, Geologic map of the Butte South 30' x 60' quadrangle, southwestern Montana: Montana Bureau of Mines and Geology, Open-File Report 622, scale 1:100,000.

McDonald, C., Lopez, D.A., Berg, R.B., and Gibson, R.J., 2005, Preliminary geologic map of the Ringling 30' x 60' quadrangle, central Montana: Montana Bureau of Mines and Geology Open-File Report 511, 27 p., 1 sheet, scale 1:100,000.

O'Brien, J. P., Lewis, R. S., Link, P. K., Whitman, S. K., Geslin, J. K., and Schmidt, K. L., 1993, Geologic map of the Buttercup Mountain quadrangle, Blaine and Camas Counties, Idaho: Idaho Geological Survey, Technical Reports T-93-1, scale 1:24,000.

O'Neill, J.M., and Christiansen, R.L., 2004, Geologic map of the Hebgen Lake quadrangle, Beaverhead, Madison, and Gallatin Counties, Montana, Park and Teton Counties, Wyoming, and Clark and Fremont Counties, Idaho: Scientific Investigations Map SIM-2816, scale 1:100,000.

Parker, S.P. and Pearson, D.M., 2020, Geologic map of the northern part of the Leadore quadrangle, Lemhi County, Idaho: Idaho Geological Survey, Technical Reports T-20-03, scale 1:24,000.

Pearson, R. C., and Zen, E., 1985, Geologic map of the eastern Pioneer Mountains, Beaverhead County, Montana, U.S. Geological Survey, Miscellaneous Field Studies Map MF-1806-A, scale 1:50,000.

Rember, W.C., and Bennett, E.H., 1979, Geologic map of the Dubois quadrangle, Idaho: Idaho Geological Survey, Geologic Map GM-7, scale 1:250,000.

Reynolds, M. W. and Brandt, T. R., 2006, Preliminary Geologic map of the Townsend 30' x 60' quadrangle, Montana: US Geological Survey, Open-File Report 2006-1138, scale 1:100,000.

Ruppel, E.T., 1980, Geologic map of the Patterson quadrangle, Lemhi County, Idaho: U.S. Geological Survey, Geologic Quadrangle Map GQ-1529, scale 1:62,500.

Ruppel, E.T. and Lopez, D.A., 1981, Geologic map of the Gilmore quadrangle, Lemhi and Custer Counties, Idaho: U.S. Geological Survey, Geologic Quadrangle Map GQ-1543, scale 1:62,500.

Ruppel, E.T., 1998, Geologic map of the eastern part of the Leadore 30' x 60' quadrangle, Montana and Idaho: Montana Bureau of Mines and Geology, Open-File Reports MBMG-372, scale 1:100,000.

Ruppel, E.T., O'Neill, J.M., and Lopez, D.A., 1993, Geologic map of the Dillon 1 degree x 2 degrees quadrangle, Idaho and Montana: U.S. Geological Survey, Miscellaneous Investigations Series Map I-1803-H, scale 1:250,000.

Schmidt, K. L., 1997, Geologic map of part of the Galena Peak and Ryan Peak quadrangles, Blaine and Camas Counties, Idaho: Idaho Geological Survey, Technical Reports T-97-1, scale 1:24,000.

Schmidt, K. L., Lewis, R. L., Burmester, R. F., and Lang, R. A., Reconnaissance Geologic map of the Shoup and Horse Creek area, Lemhi and Idaho Counties, Idaho: Idaho Geological Survey, Technical Report 94-3, scale 1:50,000.

Skipp, B., Snider, L. G., Janecke, S. U., and Kuntz, M. A., 2009, Geologic map of the Arco 30' x 60 minute quadrangle, South-Central Idaho: Idaho Geological Survey, Geologic Map GM-47, scale 1:100,000.

Skipp, B., 1984, Geologic map and cross sections of the Italian Peak and Italian Peak middle roadless areas, Beaverhead County, Montana, and Clark and Lemhi Counties, Idaho: U.S. Geological Survey, Miscellaneous Field Studies Map MF-1601-B, scale 1:62,500.

Skipp, Betty, and Janecke, S.U., 2004, Geologic map of the Montana part of the Dubois 30' x 60' quadrangle, southwest Montana: Montana Bureau of Mines and Geology, Open-File Reports 490, scale 1:100,000.

Stewart, D. E., Geslin, J. K., Mahoney, J. B., Darling, R. S., and Link, P. K., 1992, Geologic map of the Baker Peak quadrangle, Blaine and Camas Counties, Idaho: Idaho Geological Survey, Technical Reports T-92-1, scale 1:24,000.

Tysdal, R.G., and Moye, F., 1996, Geologic map of the Allison Creek quadrangle, Lemhi County, Idaho: U.S. Geological Survey, Geologic Quadrangle Map GQ-1778, scale 1:24,000.

Vuke, S.M., Lonn, J.D., Berg, R.B., and Kellogg, K.S., 2002, Geologic map of the Bozeman 30' x 60' quadrangle, southwestern Montana: Montana Bureau of Mines and Geology Open-File Report 469, scale 1:100,000.

Wilson, A.B., and Skipp, Betty, 1994, Geologic map of the eastern part of the Challis National Forest and vicinity, Idaho: Miscellaneous Investigations Series Map I-2395, scale 1:250,000.
